# Supplementary figures and images for: The Whole-Genome and Transcriptome of the Manila Clam (Ruditapes philippinarum)
Source: Oxford University Press journal article supplement (doi:10.1093/gbe/evx096), 2017-05-11

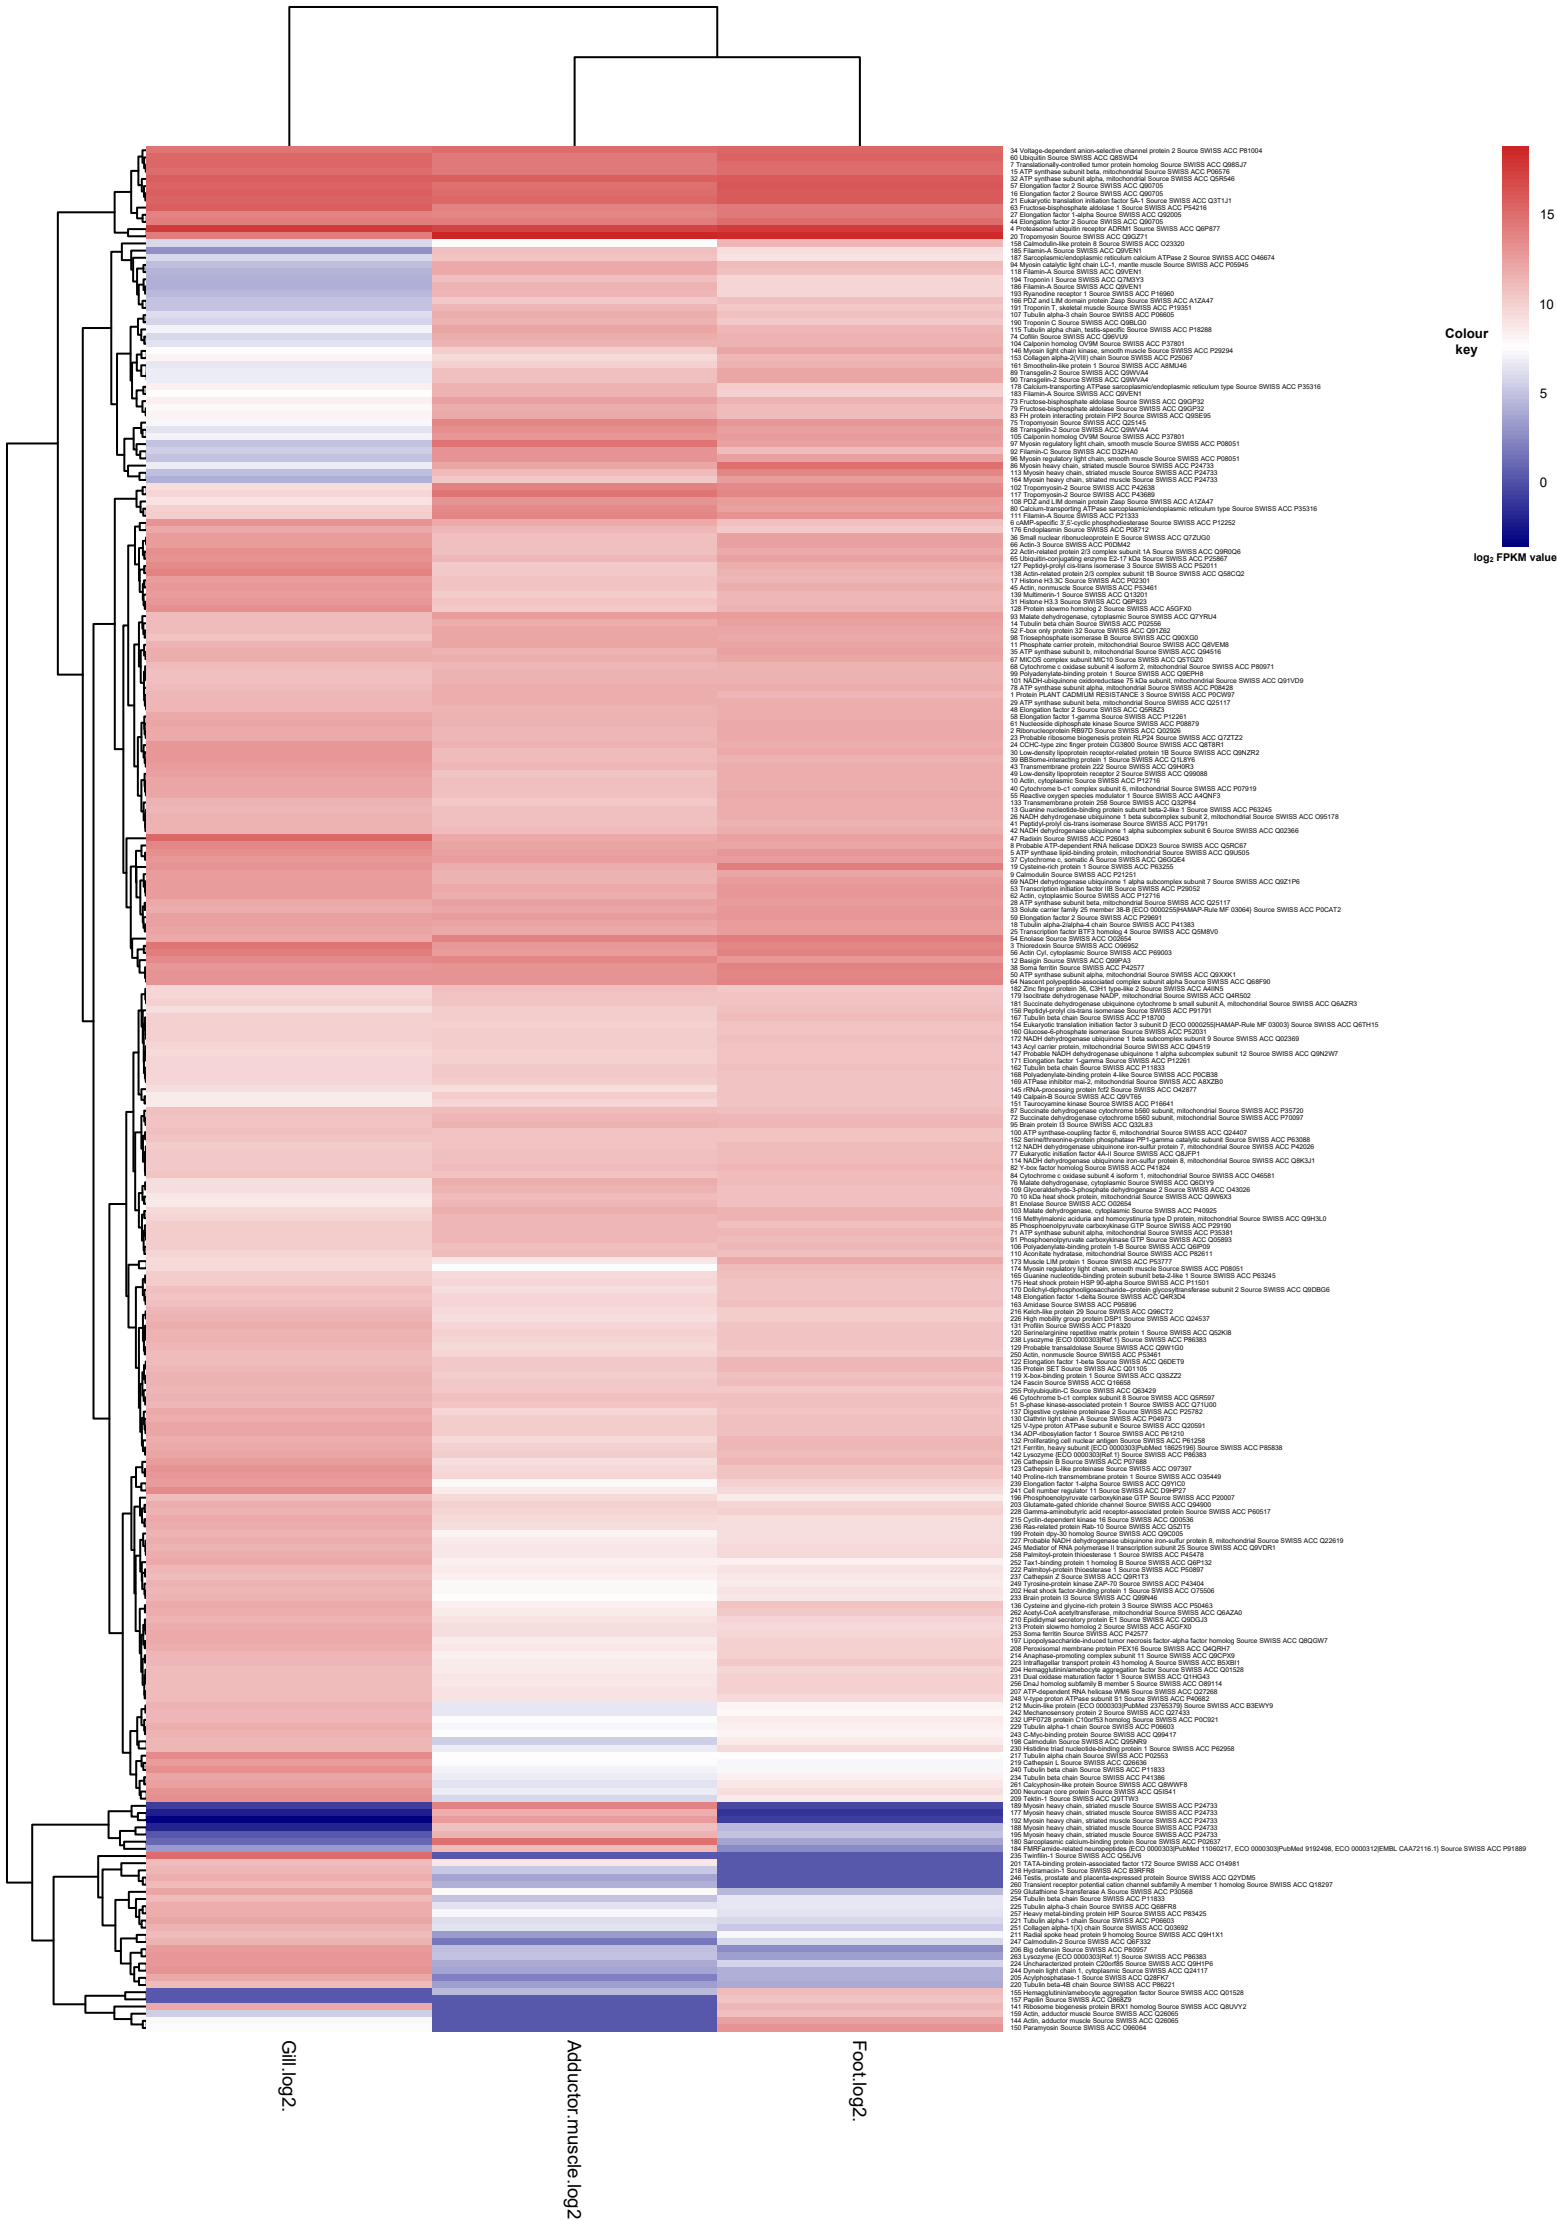

Supplement: evx096_Supp.zip [file evx096_Supp.zip]
